# Supplementary material for: Performance and economic evaluation of the molecular detection of pathogens for patients with severe infections: the EVAMICA open-label, cluster-randomised, interventional crossover trial
Source: Springer Nature journal article supplement (doi:10.1007/s00134-017-4766-4), 2017-04-03
Supplement: MOESM1 [file 12195244]

**Supplementary Table 1. List of microbes detected in the blood of patients with microbial diagnosis obtained by both blood cultures and SeptiFast molecular test during the intervention period.**

| Microbial pathogen group and species | n | |
| --- | --- | --- |
| Gram-negative bacilli (GNB) |  |  |
| *Enterobacter* | 9 |  |
| *Escherichia coli* | 20 |  |
| *Klebsiella* | 11 |  |
| *Proteus mirabilis* | 1 |  |
| *Pseudomonas aeruginosa* | 7 |  |
| Gram-positive Cocci (GPC) |  |  |
| *Staphylococcus aureus* | 24 |  |
| Coagulase negative staphylococci | 22 |  |
| Pneumococci | 7 |  |
| Streptococcus spp. | 11 |  |
| *Enterococcus faecalis* | 5 |  |
| *Enterococcus faecium* | 4 |  |
| Fungi |  |  |
| *Candida albicans* | 4 |  |
| *Candida glabrata* | 1 |  |
| *Candida krusei* | 1 |  |
| *Candida parapsilosis* | 1 |  |
| *Candida sp.* | 3 |  |

**Supplementary Table 2Type of resources and unit costs (in euros) used for the health economic study**

| Cost item | Value (social Health insurance) |
| --- | --- |
| Blood culture | 26.86 |
| Urine microbial analysis | 21.82 |
| Respiratory specimens | 67.15 |
| Aspergillus antigenemia | 33.57 |
| Candida antigenemia | 33.57 |
| Superficial pus | 40.29 |
| Deep pus | 94 |
| Ear nose throat (ENT) workup | 40.29 |
| Drainage | 40.29 |
| Chest Rxray | 26.46 |
| Bronchoscopy | 137.28 |
| Trans oesophageal Doppler US | 196.66 |
| Magnetic resonance imaging (MRI) | 85.80 |

**Supplementary Table 3 Antimicrobial prescriptions (n patients, % of patients included in the period) in the 7 days after the inclusion**

| Antimicrobial agent family or group | Total period | Intervention perioda | Control periodb |
| --- | --- | --- | --- |
| **Total population** | 1371 | 708 | 663 |
| Beta-lactams | 1309 (95.5 ) | 670 (94.6) | 639 (96.4) |
| - carbapenems | 282 (20.6) | 174 (24.6) | 108 (16) |
| - third-generation cephalosporins | 600 (44) | 294 (41.5) | 306 (46.1) |
| - others beta-lactams | 880 (64.2) | 446 (63) | 434 (65.5) |
| Aminoglycosides | 592 (43.2 ) | 313 (44.2) | 279 (42.1) |
| Glycopeptides | 289 (21.1 ) | 149 (21.05) | 140 (21.1) |
| Fluoroquinolones | 363 (26.5 ) | 185 (26.1) | 178 (26.85) |
| Anti-fungal | 242 (17.7 ) | 137 (19.4) | 105 (15.8) |
| Other antibioticsc | 434 (31.7 ) | 222 (31.4) | 212 (32.0) |
| **Severe sepsis** | 888 | 455 | 433 |
| Beta-lactams | 849 (95.6 ) | 431 (94.7) | 418 (96.5) |
| - carbapenems | 213 (24) | 129 (28.4) | 84 (19.4) |
| - third-generation cephalosporins | 404 (45.5) | 197 (43.3) | 207 (47.8) |
| - others beta-lactams | 559 (63) | 274 (60.2) | 285 (65.8) |
| Aminoglycosides | 402 (45.3 ) | 214 (47.0) | 188 (43.4) |
| Glycopeptides | 151 (17.0 ) | 85 (18.7) | 66 (15.2) |
| Fluoroquinolones | 244 (27.5 ) | 120 (26.4) | 124 (28.6) |
| Anti-fungal | 119 (13.45) | 68 (15) | 51 (11.8) |
| Other antibioticsc | 365 (41.1) | 188 (41.3) | 177 (40.9) |
| **Febrile neutropenia** | 434 | 215 | 219 |
| Beta-lactams | 423 (97.5) | 209 (97.2) | 214 (97.7) |
| Aminoglycosides | 159 (36.6) | 78 (36.3) | 81 (37.0) |
| Glycopeptides | 124 (28.6) | 54 (25.1) | 70 (32.0) |
| Fluoroquinolones | 114 (26.3) | 61 (28.4) | 53 (24.2) |
| Anti-fungal | 120 (27.7) | 67 (31.2) | 53 (24.2) |
| Other antibioticsc | 64 (14.75) | 30 (13.95) | 34 (15.5) |

a Intervention period is the period when molecular detection was added to standard care

bControl period is standard care

**Supplementary Table 4 Factors associated with 7-day mortality among the 863 patients with a severe sepsis, univariate and multivariate analyses**

|  | Death | | Univariate analysisa | | Multivariate analysisa,b | | |
| --- | --- | --- | --- | --- | --- | --- | --- |
|  | No (N=714) | Yes (N=149) | OR [95% CI] | *P* value | | OR [95% CI] | *P* value | |
| Intervention period (Yes/no) | 357 (50.0) | 82 (55.0) | 1.19 [0.81-1.76] | 0.38 | | 1.18 [0.75-1.85] | 0.47 | |
| Age, year (2/1) c | 62 [50-72.5] | 67.5 [57-77] | 1.47 [1.20-1.79] | 0.001 | | 1.33 [1.04-1.70] | 0.025 | |
| Female gender (1/0) | 225 (31.6) | 60 (40.3) | 1.44 [1.00-2.01] | 0.05 | | 1.42 [0.92-2.20] | 0.11 | |
| Medical admission | 579 (81.1) | 128 (85.9) | 1.42 [0.86-2.34] | 0.22 | | - |  | |
| Respiratory primary site of infection (87/39) | 390 (61.8) | 88 (68.2) | 1.35 [0.89-2.03] | 0.20 | | - |  | |
| Hospital acquired infection | 453 (63.5) | 104 (69.8) | 1.35 [0.92-1.99] | 0.12 | | - |  | |
| Severity of the sepsis at inclusion |  |  |  |  | |  |  | |
| SOFA score (n=5/1) d | 7 [5-10] | 11 [8-14] | 1.25 [1.18-1.31] | <0.001 | | 1.19 [1.12-1.26] | <0.001 | |
| Glasgow score (n=43/23) e | 14 [8-15] | 13 [5-15] | 1.81 [1.24-2.65] | <0.002 | | - |  | |
| SAPS score (n=7/6)f | 43 [33-56] | 60.5 [49-73] | 2.49 [1.90-3.27] | <0.001 | | 1.27 [0.97-1.66] | 0.083 | |
| Septic shock | 377 (52.8) | 115 (77.2) | 3.13 [2.06-4.74] | <0.001 | | - |  | |
| Serum Lactates mmol/L f | 2.2 [1.2-3.8] | 3.55 [2-7.8] | 1.87 [1.53-2.29] | <0.001 | | 1.58 [1.27-1.97] | <0.001 | |

Quantitative variables are expressed as median (interquartile range), qualitative variables as numbers (%)

OR, odds ratio; CI, confidence interval; ICU, intensive care unit; SOFA, Sepsis-related Organ Failure Assessment, SAPS, Simplified Acute Physiology Score

(/) indicates the number of missing values in each group

aUnivariate and multivariate analyses were performed using a random-center effect logistic regression adjusted for order of intervention (study period first or second; bmultivariate analysis was also adjusted for the six variables listed in the table

Odds ratios and 95% confidence intervals are expressed cper 1 SD increase; dper one point increase; e according to the median value (< 14); and fper 1 SD increase in the log-transformed value
