# Supplementary material for: Performance and economic evaluation of the molecular detection of pathogens for patients with severe infections: the EVAMICA open-label, cluster-randomised, interventional crossover trial
Source: Springer Nature journal article supplement (doi:10.1007/s00134-017-4766-4), 2017-04-03
Supplement: MOESM3 [file 12195244]

Supplement methods

The EVAMICA trial (Evaluation médico-économique de la détection rapide des bactériémies et fongémies par PCR en temps réel dans les neutropénies fébriles, suspicions d’endocardite infectieuse, et sepsis sévères en réanimation) was planned as a cluster trial because of logistical constraints and methodological issues, especially to prevent contamination between groups. A crossover trial was chosen because the risk of cross-contamination was minimal and this design offered a better balance between groups.

Eligibility criteria for clusters were volunteers’ hospitals, including bacteriology and mycology laboratories, admitting eligible patients for at least one of the three targeted infections (SES, FN, or SIE). Fifteen hospitals (APHP-Beaujon, APHP-Cochin, APHP-Mondor, APHP-Pitié-Salpêtrière, APHP-Saint Antoine, APHP-Saint Louis, Brest, Grenoble, Lille, Limoges, Lyon, Reims, Saint Etienne, Strasbourg, Tours) were participating for all the three indications, one (APHP-Bichat) for 2 and two (Bordeaux, Marseille) for one. Between May 2008 and May 2010, each center was randomized for starting an intervention period followed by a control period or the opposite. The calendar of each period per hospital was set with 6 to 9 months depending on the number of patients to be included. Clinicians were responsible for the initiation and streamlining of the antimicrobial therapy, with either de-escalation or addition of one or more antimicrobial agents at the time of receiving the microbiological results, whether they were molecular or blood culture results.

Eligible patients were consecutively included, except during weekends in both periods because the molecular test could not be performed due to staff and logistic constraints. All patients signed a written informed consent. Patients previously included in the study, or with no health-care insurance, or with already microbiologically documented infection at time of eligibility were not included. Adult patients (age > 18 years) were enrolled when meeting a clinical diagnosis of (i) severe sepsis (including septic shock) as defined by [1, 10], (ii) a first episode of febrile neutropenia (e.g. first onset of fever during an episode of neutropenia below 500 neutrophils/mm3)[3, 13], or (iii) a suspicion of infective endocarditis, i.e. evidence of cardiac involvement (major cardiac criteria of the modified-Duke classification) and at least two of the minor criteria among the predisposition factors, fever, vascular phenomena and immunologic phenomena [5]. For the suspicion of endocarditis, the basic positivity rate was assumed to be 20-30%, without previous evidence studies, since the reference definition of infective endocarditis already includes a positive microbial criteria [4]. The main outcome was at the patient level. Patients could be included only once.

**Randomisation and masking**

Allocation of hospitals to start with the intervention or the control period (CP) was based on a computer-generated randomisation list, stratified according to the expected number of SES and FN cases, generated by an independent data manager. Because of the nature of the intervention, blinding was not possible. However, the analyses of study periods (intervention or CP) and of which microbiological test (blood culture or molecular test) was positive were conducted blindly.

**Potential confounders**

Patient characteristics, medical admission (vs surgical), site of infection, place of infection acquisition (community- or hospital-acquired), severity (SOFA and SAPS II scores, septic shock, serum lactate level), date of inclusion, order of the intervention period (1st or second) and the intervention itself (molecular test or not) were examined as factors that may affect blood microbial documentation. These factors were also considered as predictors of 7-day mortality.

**Microbiological testing**

Laboratory technicians from each participating site were trained for 3 days at a reference technical center (Lille Bacteriology laboratory), which also performed regular external quality controls. The reference center staffs had been previously trained by Roche at the Rotzkreutz Center. All runs were checked for internal controls and were occasionally checked for all data by the reference center.

The LightCycler® Septi*Fast* detects 16 bacteria (10 Gram-negative and 6 Gram-positive) and six fungi including five *Candida* species and *Aspergillus fumigatus* commonly found in severe infections (list in the Table 4). This test was performed directly on blood sampled at the onset of the infection. From the 3 ml blood collected in EDTA tubes, 1·5 ml was used for manual DNA extraction using DNA-free reagents and materials as recommended by the manufacturer. Since the time on hands for LSF ranged between 5 to 7 hours, depending on the number of tests per run, the molecular tests were done during the day starting from 9 or 10 a.m. on the specimens collected (day and night) during the previous 24 hours. The result was transmitted to the clinical ward by phone call, fax or computer, as usually done by the hospital center for other microbial results.

**Statistical analysis**

Continuous data are presented as mean (SD) or median (interquartile range, Q1–Q3) as appropriate. Categorical data are presented as counts and proportions. The statistical analysis followed the intention-to-treat principle, i.e., all patients were analysed in the period (intervention or CP) to which their hospital was randomly assigned even if the other strategy was applied. We tested effect modification by clinical setting (SES, FN, and SIE) and then performed stratified analyses because of significant interaction between the study period (intervention or control) and the subgroup of infection.

Multivariate modelling that considered potential confounders at the patient level was also performed (see appendix for potential confounders analysed). Similar multivariate modelling was also used to investigate potential study intervention impact on 7-day mortality. To assess the agreement between the results of the molecular test and those of blood cultures, we used the kappa (k) statistics. Kappa’s agreement was considered very poor if ≤ .20, poor between [.21-.40], moderate [.41-.60], good [.61-80], and excellent [.81-1.00]. The TAT to results was compared between groups using linear mixed-effects models to account for clustering by centre.

**Economic evaluation**

The costs of implementing the molecular test consisted largely of staff training and were considered part of ongoing continuing education. We did not include costs incurred after hospital discharge or indirect costs, such as productivity loss and other nonmedical expenses. Resource use data were obtained from the trial CRF and hospital discharge information. This included the molecular test, use of other diagnostic tests and procedures to identify microorganisms and antibiotic prescriptions. Detailed resource use data collection was limited to interventions related to the infection.

A cost-effectiveness analysis was conducted to assess incremental cost per additional patient with microbial documentation within 24 hours. The analytic focus of the cost effectiveness analysis was on the estimation of the joint density of cost and effect differences and the quantification of uncertainty surrounding the incremental cost-effectiveness ratio. The absence of a significant difference on either cost, or effectiveness, or both did not preclude the presentation of such data on the cost-effectiveness plane.

Analyses were performed using Stata 12 (StataCorp, TX, US), SAS (SAS Corporation, Carey NC USA), and Microsoft Excel (Microsoft Corporation, Redmond, WA, USA) software. Costs were compared using the Student’s *t* test and non-parametric Wilcoxon test. Mean and 95% CIs were generated for cost variables. A two-sided p value of less than 0**·**05 was considered to indicate statistical significance. No interim analysis was performed.
