# Supplementary material for: Performance and economic evaluation of the molecular detection of pathogens for patients with severe infections: the EVAMICA open-label, cluster-randomised, interventional crossover trial
Source: Springer Nature journal article supplement (doi:10.1007/s00134-017-4766-4), 2017-04-03
Supplement: MOESM4 [file 12195244]

**List of collaborators of the EVAMICA study team**

*Centre APHP-Beaujon, Clichy, France*: Agnès Lefort, Jean Mantz, Sébastien Pease, Leïla Lavagna, Marie Hélène Nicolas-Chanoine, Véronique Leflon, Estelle Marcon

*Centre APHP-Bichat, Paris, France:* Raymond Ruimy, Antoine Andremont, Jacques Lebras, Bernard Iung, Bernard Regnier, Patrick Yeni, Philippe Montravers, Bruno Mourvillier, Emila Ilic-Habensus, Nadia El Alami Talbi, Sigismond Lasocki

*Centre APHP-Cochin, Paris, France*: Didier Bouscary, Jean-Paul Mira, David Grimaldi, Nathalie Marin, Alexandra Doloy, Claire Poyart

*Centre APHP-Henri Mondor, Créteil, France*: Emmanuel  Scherrer, Cecile Chambon-Pautas, Fabrice Cook, Armand Mekontso-Dessap, Frédérique Schortgen, Karine Chedevergne

*Centre APHP-Pitié-Salpêtrière, Paris, France*: Jean-Paul Vernant, Liliane Gauvin-Bodin, Jean-Louis Trouillet, Jean  Chastre, François Bricaire, Nathalie Dheder, Ania Nieszkowska, Annick Datry, Arnaud Fekkar, Pierre Buffet, Rommy Mazier, Sophie Brun, Vanina Meyssonnier, Florence Brossier, Vincent Jarlier

*Centre APHP-Saint Antoine, Paris, France*: Françoise Isnard, Jean-Luc Baudel, Jean-Luc Meynard, Valérie Lalande, Jean-Claude Petit, Patricia Roux

*Centre APHP-Saint Louis, Paris, France*: Emmanuel Raffoux, Patricia Ribaud, Vincent Das, Benoit Schlemmer, Elie Azoulay, Luc Chimot, Jean-Michel Molina, Diane Ponscarme, Juliette Pavie, Isabelle Casin, Jean Menotti, François Simon

*Centre CHU Pellegrin, Bordeaux, France:* Didier Gruson, Emilie Bessède, Emmanuelle Guilhon, Isabelle Accoceberry, Pascal Millet, Cécile Bébéar

*Centre CHU Morvan and Cavale Blanche, Brest, France*: Christian Berthoux, Jean-Marie Tonnelier, Michel Garre, Geneviève Hery-Arnaud, Christopher Payan, Gilles Nevez

*Centre CHU Michallon, Grenoble, France*: Jean-Francois Timsit, Jean-Yves Cahn, Jean-Paul Brion, Bernard Le Beau, Danièle Maubon, Hervé Pelloux, Max Maurin, Olivier Epaulard, Rebecca Hamidfar

*Centre CHRU Lille, France*: Céline Berthon, Valérie Coiteux, Louis Terriou, Saadalla Nseir, Jean-Luc Auffray, Jean-Pierre Jouet, Alain Durocher, Karine Faure, Daniel Camus

*Centre CHU Dupuytren, Limoges, France*: Anthony Dugard, Chantal Tisseuil, Cécile Duchiron, Daniel Ajzenberg, Dominique Bordessoule, Fabien Garnier, Bruno François, Marie-Cécile Ploy, Marie-Laure Darde, Marie-Pierre Chaury, Stéphane Girault, Arnaud Jaccard, Stéphane Moreau, Liliane Réménieras, Mohamed Touati, Pascal Turlure, Jean-Bernard Amiel, Marc Clavel, Anthony Dugard, Nicolas Pichon, Déborah Postil, Philippe Vignon

*Centre CHU la Croix Rousse, Lyon, France:* Daniel Espinouse, Didier Jacques, Frédérique De Monbrison, Jean-Michel Grozel, Monique Chomarat, Pierre-Yves Gueugniaud, Rokiatou Sanogo

*Centre CHU La Timone, Marseille, France*: Michel Drancourt, Pierre Edouard Fournier, Véronique Roux

*Centre CHU Reims, France:* Alain Delmer, Chantal Himberlin, Brigitte Kolb, Quoc Hung Lé, Morgane Appriou, Joël Cousson, Pierre Nazeyrollas, Christophe Strady, Christophe de Champs, Véronique Vernet, Alain Delmer, Dominique Toubas

*Centre CHU Saint Etienne, France:* Denis Guyotat, Christian Auboyer, Fabrice Zeni, Eric Alamartine, Pascal Cathebras, Frédéric Lucht, Alain Viallon, Adrien Melis, Alain Ros, Anne Carricajo, Camille Devanlay, Carine Labruyere, Catherine Vautrin, Céline Cazorla, Emmanuelle Tavernier, Florence Grattard, Gérald Aubert, Jerome Morel, Jérome Cornillon, Karima Abba, Pierre Flori, Roger Tran Manh Sung, Bruno Pozzetto

*Centre CHU Strasbourg, France*: Francis Schneider, Yves Hansmann, Raoul Herbrecht, Julien Pottecher, Benoit Jaulhac, Yves Piémont, Valérie Lestcher

*Centre CHU Tours, France*: Philippe Colombat, Delphine Senecal, Denis Garot, Dominique Perrottin, Jean-Marc Besnier, Alain Goudeau, Philippe Lanotte, Jacques Chandenier

***Centre coordinators***

Marie Hélène Nicolas-Chanoine (APHP-Beaujon) ; Raymond Ruimy (APHP -Bichat) ; Alexandra Doloy (APHP -Cochin) ; Stéphane Bretagne (APHP -Henri Mondor) ; Florence Brossier, (APHP -Pitié-Salpêtrière) ; Valérie Lalande (APHP -Saint Antoine) ; Isabelle Casin (APHP -Saint Louis) ; Cécile Bébéar (Bordeaux) ; Geneviève Hery-Arnaud (Brest) ; Max Maurin (Grenoble) ; René Courcol (Lille) ; Marie-Cécile Ploy (Limoges) ; Monique Chomarat (Lyon) ; Michel Drancourt (Marseille) ; Christophe de Champs (Reims) ; Florence Grattard (Saint Etienne) ; Yves Piémont (Strasbourg) ; Philippe Lanotte (Tours)

***Clinical research teams***

Samia Baloul, Céline Corbel, Moufida Dabbech, Mabel Gaba, Elsa Jozefowicz , Magali Lafaye, Remi Rabeuf, Hasina Rabetrano, Kalaivani Veerabudun, Cédric Viallette

***Scientific Committee***

Emmanuelle Cambau, Isabelle Durand-Zaleski, Stéphane Bretagne, Christian Brun-Buisson, Catherine Cordonnier, Xavier Duval, Stéphanie Herwegh, René Courcol, Sylvie Bastuji-Garin, Jean-Paul Stahl, Raoul Herbrecht, Laurence Delhaes, Karine Faure, Julien Pottecher
